# Supplementary material
Source: publisher figshare collection journal article supplement (https://acs.figshare.com/ndownloader/files/8730085)
Supplement: Supplementary file 1 [file 8730085]

## Sheet: Sheet1
SI-Table 5. Least Discriminant Effect Size (LEfSe) Analysis of Fungal Community
Fungal genera	(log 10) Highest Mean Value	Sampling sites	LDA Score (log 10)	P-Value
Basidiobolus	4.80092	Raw	4.4605	0.00650566
Schizangiella	4.74251	Raw	4.38738	0.000326847
Rozella	4.12454	Raw	3.74691	0.00198119
Mrakiella	4.05361	Raw	3.74332	0.0318454
Neobulgaria	3.96607	Raw	3.68784	0.000776286
Acaulospora	4.09091	Raw	3.67655	0.0109853
Sarcosphaera	3.87498	Raw	3.6057	0.00175155
Mortierella	3.87715	Raw	3.55414	0.0130474
Massarina	3.81699	Raw	3.51737	0.000982928
Pezizella	3.81306	Raw	3.50657	0.0173641
Ochrocladosporium	3.88274	Raw	3.50067	0.0248577
Laetiporus	3.88408	Raw	3.48947	0.00517352
Tremella	3.79859	Raw	3.47224	0.00336403
Cordyceps	3.8217	Raw	3.4712	0.0241604
Leptodontidium	3.73174	Raw	3.39477	0.0172785
Lactarius	3.75109	Raw	3.37856	0.000856038
Olpidium	3.7719	Raw	3.36777	0.00422416
Pseudeurotium	3.70794	Raw	3.36236	0.00181264
Varicosporium	3.62092	Raw	3.31928	0.00503815
Williopsis	3.65685	Raw	3.26052	0.0131119
Spirosphaera	3.61332	Raw	3.23573	0.0106247
Pyrenochaetopsis	3.57755	Raw	3.20204	0.0292224
Tyromyces	3.4131	Raw	3.16161	0.018186
Proliferodiscus	3.46457	Raw	3.12755	0.00508151
Minimedusa	3.43803	Raw	3.08711	0.00758771
Leucosporidium	3.39382	Raw	3.08286	0.0221778
Fusarium	3.39077	Raw	3.04952	0.030912
Dokmaia	3.35076	Raw	3.03324	0.00102427
Cucurbitaria	2.7282	Raw	3.02915	0.0189529
Anguillospora	3.35361	Raw	3.0263	0.00649689
Glaciozyma	3.36392	Raw	3.01473	0.0433287
Rhizopus	3.34039	Raw	3.00454	0.00289075
Holwaya	3.32782	Raw	3.00434	0.0248348
Leptosphaeria	3.13108	Raw	2.97193	0.00638353
Dipodascus	3.23856	Raw	2.96833	0.0274284
Phialemonium	3.30026	Raw	2.95849	3.69e-05
Plectosphaerella	3.21309	Raw	2.94837	0.000132903
Preussia	3.24521	Raw	2.91361	0.000773056
Collophora	3.207	Raw	2.90676	0.00924315
Fellomyces	3.16859	Raw	2.89502	0.000872095
Neosetophoma	2.6376	Raw	2.88708	0.00484907
Leohumicola	3.20655	Raw	2.88268	0.00130334
Heterobasidion	3.23916	Raw	2.88095	0.00740496
Mycoarthris	3.16374	Raw	2.8775	0.00223183
Ophiocordyceps	3.13195	Raw	2.87197	0.000136457
Microscypha	3.17911	Raw	2.87036	0.000655956
Microbotryum	3.1082	Raw	2.86253	4.85e-05
Glomus	2.8581	Raw	2.85789	0.017045
Phaeangium	3.09068	Raw	2.84511	0.000102805
Hericium	3.06031	Raw	2.82538	0.0024962
Typhula	3.17395	Raw	2.8146	0.0482021
Monacrosporium	3.17149	Raw	2.81455	0.00347161
Dioszegia	3.0457	Raw	2.79849	0.0236816
Scolecobasidium	2.496	Raw	2.78173	0.00576667
Inocybe	3.11978	Raw	2.78103	0.00126389
Pilidium	3.01242	Raw	2.75022	0.0021454
Camarophyllopsis	2.97183	Raw	2.73908	0.000696219
Thelebolus	2.93154	Raw	2.72981	0.000310701
Dimorphospora	2.99423	Raw	2.72674	0.00243299
Conidiobolus	3.13689	Raw	2.72597	0.0200075
Hannaella	2.85821	Raw	2.70486	0.0306806
Tumularia	3.01518	Raw	2.7008	0.0259625
Hygrocybe	2.94327	Raw	2.6982	0.000258679
Trichoderma	2.96435	Raw	2.6854	0.00122365
Hypocrea	2.90789	Raw	2.67873	0.000156438
Galactomyces	2.98887	Raw	2.66598	0.015573
Pandora	2.98581	Raw	2.66245	0.0193168
Beauveria	2.67345	Raw	2.65673	0.00115264
Bullera	2.9733	Raw	2.65213	0.00201848
Corynespora	2.60468	Raw	2.65034	0.00453592
Nephroma	2.97019	Raw	2.64724	0.000568124
Clavulina	2.78299	Raw	2.63896	0.0350037
Tricladium	2.7653	Raw	2.62682	0.000321199
Sarea	2.84892	Raw	2.61942	0.00287304
Microdiplodia	2.87281	Raw	2.61676	0.00104178
Occultifur	2.86716	Raw	2.61215	0.0019173
Cylindrosympodium	2.65257	Raw	2.58987	0.0309218
Scutellospora	2.38058	Raw	2.56916	0.000451828
Moniliella	2.68735	Raw	2.56065	0.00437464
Crocicreas	2.82005	Raw	2.54718	0.00944394
Helicoma	2.66375	Raw	2.5455	0.00221538
Talaromyces	2.83046	Raw	2.54089	7.31e-05
Chaunopycnis	2.47306	Raw	2.53247	0.0154988
Blastobotrys	2.85417	Raw	2.52462	0.00866472
Lycoperdon	2.73353	Raw	2.51928	0.000716081
Cosmospora	2.58376	Raw	2.42525	0.0424174
Articulospora	3.93599	Post_sedimentation	3.55493	0.0198877
Zalerion	3.85606	Post_sedimentation	3.55266	0.00432833
Leptodiscella	3.77643	Post_sedimentation	3.43288	0.00205471
Leptosphaerulina	3.69545	Post_sedimentation	3.36972	0.00722022
Erysiphe	3.60506	Post_sedimentation	3.30294	0.0227232
Cadophora	3.51793	Post_sedimentation	3.21542	0.00473465
Septoria	3.51525	Post_sedimentation	3.18992	0.0414796
Phlebia	3.42658	Post_sedimentation	3.1362	0.00731891
Phialophora	3.49774	Post_sedimentation	3.12159	0.0138743
Nectria	3.43666	Post_sedimentation	3.1162	0.000601774
Mycosphaerella	3.43623	Post_sedimentation	3.09032	0.0064328
Dermatocarpon	3.41088	Post_sedimentation	3.06602	0.0277221
Herpotrichia	3.43014	Post_sedimentation	3.05091	0.0390435
Jahnula	3.18886	Post_sedimentation	2.88571	0.00586337
Peziza	3.20218	Post_sedimentation	2.87779	0.00126407
Cortinarius	3.13048	Post_sedimentation	2.8383	0.00963063
Ypsilina	3.03513	Post_sedimentation	2.82722	0.042636
Noosia	3.14186	Post_sedimentation	2.75762	0.043065
Cercospora	3.03283	Post_sedimentation	2.74571	0.000917925
Gibellulopsis	2.86264	Post_sedimentation	2.59796	0.0353181
Sclerotium	2.27548	Post_sedimentation	2.21796	0.0391741
Sporobolomyces	3.74363	Post_filtration	3.55033	0.0431289
Diatrypella	3.36452	Post_filtration	2.86061	0.0297569
Hypoxylon	3.16959	Post_filtration	2.82275	0.00236696
Phialocephala	3.25308	Post_filtration	2.78866	0.0317808
Marssonina	2.90588	Post_filtration	2.59209	0.0349503
Golovinomyces	2.48499	Post_filtration	2.50097	0.0223629
Diatrype	2.7038	Post_filtration	2.44263	0.00824995
Penicillium	5.53031	Post_disinfection	5.26262	0.00105089
Aspergillus	4.58686	Post_disinfection	4.20546	0.00759185
Exophiala	3.71906	Post_disinfection	3.35042	0.0488582
Tetracladium	3.56007	Post_disinfection	3.21297	0.00940999
Cladophialophora	2.43269	Post_disinfection	2.58645	0.024752
Pleurothecium	2.78199	Post_disinfection	2.55752	0.00973506
Prosthemium	2.78199	Post_disinfection	2.54621	0.00338977
Coleophoma	2.76167	Post_disinfection	2.54615	0.0443533
Capronia	2.22446	Post_disinfection	2.48662	0.0179221
Ilyonectria	1.16701			-
Xenophacidiella	1.77281			-
Labyrinthomyces	0.631884			-
Xenosonderhenia	1.68968			-
Lopharia	2.9841			-
Blumeria	2.09889			-
Neophaeosphaeria	1.51723			-
Thanatephorus	3.29563			-
Sporopachydermia	1.99098			-
Inocutis	0.631884			-
Bartalinia	3.96201			-
Hyphoderma	3.34763			-
Hyalopycnis	2.1843			-
Coniosporium	3.35263			-
Discostroma	2.30448			-
Wallemia	4.56709			-
Rhizophlyctis	3.17909			-
Entonaema	2.25369			-
Skeletocutis	2.78164			-
Resupinatus	2.43794			-
Bacidia	1.25206			-
Whalleya	1.44177			-
Ciboria	0.716229			-
Rhodoveronaea	1.08661			-
Cephaliophora	2.72137			-
Candida	4.0014			-
Zygopleurage	1.1419			-
Corynascus	1.29546			-
Issatchenkia	2.54716			-
Dichotomocladium	1.77876			-
Corticium	1.5065			-
Lanatonectria	0.66199			-
Phaeoisaria	2.54002			-
Obba	1.77139			-
Placynthiella	0.511337			-
Trematosphaeria	0.926785			-
Nemania	1.81937			-
Coprinellus	3.40331			-
Paraconiothyrium	4.20678			-
Pleopsidium	1.53511			-
Thelotrema	3.86871			-
Pterula	2.08868			-
Ramularia	3.36963			-
Campylocarpon	1.07242			-
Ombrophila	0.511337			-
Itersonilia	2.54226			-
Gymnomyces	1.01726			-
Cantharellula	1.93309			-
Gliomastix	1.06798			-
Athelopsis	0.631884			-
Microsphaeropsis	2.52742			-
Elaphocordyceps	2.63046			-
Pezicula	1.58898			-
Micarea	2.57398			-
Dactylaria	3.03098			-
Trametes	3.6259			-
Tilletia	2.53401			-
Gyoerffyella	0.511337			-
Torrendiella	1.69765			-
Derxomyces	1.44598			-
Glypholecia	0.970324			-
Scopuloides	2.75575			-
Pleonectria	2.11343			-
Lichenomphalia	2.64829			-
Pleurotopsis	0.404169			-
Melanocarpus	1.1419			-
Thelephora	1.62941			-
Albotricha	2.20891			-
Paxillus	1.01726			-
Conferticium	1.94708			-
Microcyclosporella	1.85649			-
Alpova	0.716229			-
Cryptococcus	4.63813			-
Spadicoides	1.408			-
Geomyces	1.54169			-
Candelariella	1.95029			-
Haplotrichum	2.46487			-
Claviradulomyces	1.0575			-
Verticillium	1.53743			-
Meliniomyces	2.60392			-
Megacollybia	0.511337			-
Ceriporia	2.96366			-
Polytolypa	0.631884			-
Trapeliopsis	2.00349			-
Macrotyphula	2.72072			-
Dictyosporium	1.93559			-
Spiromastix	1.83565			-
Fuscoporia	4.24223			-
Rosellinia	1.59052			-
Tremellogaster	0.553091			-
Paradictyoarthrinium	0.511337			-
Phacidiopycnis	1.03021			-
Claroideoglomus	2.78946			-
Valsa	1.4009			-
Pseudaegerita	2.53888			-
Scirrhia	0.716229			-
Dendroclathra	1.40417			-
Amylocorticium	1.1134			-
Meyerozyma	0.812367			-
Morinia	3.01533			-
Entyloma	1.53958			-
Toninia	2.52549			-
Xenocylindrosporium	0.932914			-
Gilbertella	0.970324			-
Buellia	1.53612			-
Oedocephalum	2.26912			-
Chlorociboria	2.50158			-
Stropharia	1.86139			-
Emericella	1.50271			-
Scoliciosporum	2.06268			-
Geastrum	1.62953			-
Mastigobasidium	3.39344			-
Melampsora	2.58585			-
Acarospora	2.58708			-
Macrolepiota	1.6159			-
Kretzschmaria	1.16701			-
Galerina	1.64589			-
Phaeoacremonium	2.72928			-
Syncephalastrum	2.24642			-
Ulocladium	2.65216			-
Mucor	2.32318			-
Auricularia	2.16567			-
Jattaea	1.35643			-
Repetobasidium	1.5991			-
Udeniomyces	1.99882			-
Bensingtonia	1.23615			-
Wickerhamomyces	1.90232			-
Sticta	1.78558			-
Pleuroceras	1.65956			-
Myrmecridium	3.47973			-
Pertusaria	2.00349			-
Scleromitrula	1.42528			-
Zygowilliopsis	1.43533			-
Dictyochaeta	2.15886			-
Fomes	3.25294			-
Variocladium	2.79156			-
Cistella	0.716229			-
Pseudochaete	1.47154			-
Merismodes	1.98387			-
Rhizopogon	2.00349			-
Insolibasidium	2.13629			-
Aspicilia	2.05056			-
Allantophomopsis	2.89863			-
Megacapitula	0.511337			-
Kriegeria	2.82275			-
Pachyphloeus	1.80992			-
Sarcinomyces	1.6466			-
Dothiorella	0.532363			-
Rhizophydium	2.85805			-
Apiosordaria	1.2626			-
Glionectria	1.1419			-
Contumyces	1.69287			-
Serpula	0.553091			-
Calycellina	1.94708			-
Bovista	1.80812			-
Hydnotryopsis	1.94535			-
Parmastomyces	1.31829			-
Bauerago	2.06152			-
Pyxine	1.28657			-
Gyalecta	1.94708			-
Farysizyma	1.19335			-
Lecania	3.68369			-
Agrocybe	2.08595			-
Hypoderma	1.61154			-
Acremonium	3.13036			-
Pseudallescheria	2.89917			-
Peyronellaea	2.55264			-
Aegerita	1.9897			-
Ciborinia	1.76661			-
Mitrula	0.958355			-
Dicyma	0.812367			-
Rhinocladiella	2.15743			-
Catenaria	2.45205			-
Sigmoidea	0.553091			-
Clavariopsis	3.22666			-
Leptographium	1.97019			-
Versicolorisporium	0.812367			-
Stereum	3.47644			-
Kondoa	1.21121			-
Meruliopsis	2.2481			-
Phaeophyscia	0.631884			-
Lunulospora	2.22223			-
Paraphaeosphaeria	1.94708			-
Helgardia	2.17204			-
Leucogyrophana	1.72421			-
Ophiostoma	2.21315			-
Lodderomyces	1.7801			-
Physoderma	2.83795			-
Gloniopsis	1.67892			-
Ampelomyces	1.22608			-
Scleroconidioma	1.38891			-
Mycoclelandia	0.716229			-
Wickerhamia	1.65789			-
Thelonectria	2.14719			-
Cephalosporium	3.04399			-
Septobasidium	1.37236			-
Kluyveromyces	2.16465			-
Saccharomycodes	2.98482			-
Rhizopycnis	2.23005			-
Dothiora	0.96302			-
Mollisia	2.24642			-
Sclerostagonospora	3.2614			-
Polyscytalum	2.88508			-
Punctulariopsis	2.86507			-
Immersidiscosia	3.59378			-
Scytalidium	1.83932			-
Peltaster	2.19103			-
Perenniporia	3.63406			-
Polycephalomyces	0.404169			-
Tricholoma	2.56664			-
Bankera	1.13442			-
Diplodia	0.66199			-
Flumicola	1.23394			-
Lophiostoma	3.8175			-
Schwanniomyces	2.28257			-
Lecidella	1.49507			-
Entrophospora	2.44009			-
Doratomyces	1.23073			-
Marchandiomyces	2.80949			-
Rhizoctonia	3.19715			-
Calostoma	2.65848			-
Helicodendron	1.77837			-
Solenopezia	2.42504			-
Sagenomella	1.49374			-
Polyporus	2.94052			-
Plenodomus	1.7167			-
Delastria	1.13911			-
Hemileia	1.08661			-
Verrucula	1.34563			-
Eichleriella	1.59157			-
Elmerina	1.91272			-
Leucosporidiella	3.06048			-
Dacryopinax	1.69357			-
Camarosporula	2.01198			-
Chloridium	0.716229			-
Gaeumannomyces	2.06604			-
Simocybe	2.4427			-
Rectipilus	2.10729			-
Pyronema	1.01726			-
Kodamaea	2.30058			-
Robillarda	3.36112			-
Tubeufia	2.04886			-
Hydnum	2.54098			-
Microcyclospora	2.6576			-
Limonomyces	2.72871			-
Abortiporus	2.4779			-
Syzygospora	2.81052			-
Eurotium	2.93874			-
Paraleptosphaeria	2.01773			-
Hypomyces	1.23133			-
Bulleribasidium	1.61596			-
Cladonia	2.91415			-
Microglossum	2.29214			-
Lepraria	2.24642			-
Radulidium	2.24811			-
Flammulaster	1.7627			-
Sesquicillium	1.64304			-
Hyphodermella	3.50993			-
Trichopeziza	1.97725			-
Poriodontia	1.01726			-
Phaeococcomyces	2.89509			-
Clypeosphaeria	0.631884			-
Stagonospora	1.59779			-
Camarographium	3.098			-
Raffaelea	1.70333			-
Vermispora	1.17784			-
Neofabraea	2.58792			-
Pseudotomentella	2.53646			-
Podospora	2.53162			-
Kappamyces	2.19657			-
Colletotrichum	3.83653			-
Xenoconiothyrium	1.68284			-
Ramaria	2.65244			-
Heteroacanthella	2.54767			-
Athelia	2.47679			-
Emericellopsis	2.14203			-
Coriolopsis	2.27295			-
Sphaeronaemella	0.511337			-
Beltrania	1.65732			-
Reniforma	3.8389			-
Haloguignardia	0.511337			-
Gliocephalotrichum	1.27071			-
Verrucaria	2.23187			-
Dendryphion	1.41021			-
Cudoniella	2.98474			-
Trichopezizella	1.52602			-
Oliveonia	2.1134			-
Holtermannia	0.716229			-
Lepiota	1.88441			-
Coccomyces	1.73109			-
Laetisaria	1.41989			-
Coprinopsis	3.75202			-
Biscogniauxia	3.02228			-
Marasmiellus	2.99131			-
Harzia	0.511337			-
Clitocybe	1.01726			-
Archaeospora	1.56727			-
Suillus	3.01552			-
Geniculifera	2.24006			-
Plicaturopsis	2.83844			-
Ganoderma	4.06969			-
Botryosphaeria	2.27295			-
Moniliophthora	1.1419			-
Geopyxis	1.92213			-
Fulvoflamma	1.6378			-
Eutypa	1.78832			-
Metschnikowia	1.9301			-
Diplomitoporus	1.7428			-
Trichocladium	1.44001			-
Nakazawaea	2.93291			-
Clavicorona	2.19382			-
Pyrenula	1.54188			-
Lecidea	2.25219			-
Lyophyllum	0.511337			-
Paraphoma	2.84954			-
Manglicola	0.932914			-
Monographella	1.81422			-
Phlebiella	1.97491			-
Volutella	2.78307			-
Gomphus	1.94708			-
Sarocladium	1.23394			-
Clavispora	2.7167			-
Calocera	2.9814			-
Roesleria	2.16272			-
Fimetariella	1.54109			-
Poculum	1.31556			-
Trichophyton	1.7496			-
Gibberella	1.8923			-
Gloeoporus	2.61951			-
Postia	2.24617			-
Bulgaria	2.58132			-
Atraporiella	3.098			-
Lalaria	3.60798			-
Sphaerographium	1.81532			-
Anthostomella	2.24642			-
Lachancea	0.631884			-
Thielavia	2.29917			-
Lachnellula	2.24702			-
Trinosporium	0.511337			-
Camillea	2.18955			-
Heliscus	2.01091			-
Cladorrhinum	1.47698			-
Barnettozyma	0.970195			-
Alternaria	3.62175			-
Aurantiporus	2.55798			-
Cystofilobasidium	3.79635			-
Sphaerobolus	1.07078			-
Teratosphaeria	3.45166			-
Xenobotrytis	2.57442			-
Trimmatostroma	3.25217			-
Loreleia	0.553091			-
Curreya	2.56009			-
Lanzia	0.511337			-
Falcocladium	1.35643			-
Mrakia	4.86295			-
Biatora	2.2594			-
Debaryomyces	2.45954			-
Flagellospora	1.59052			-
Graphium	1.31093			-
Phialosimplex	0.511337			-
Torula	3.00515			-
Leptospora	3.94251			-
Bacidina	3.73249			-
Sclerotinia	2.4242			-
Magnaporthe	1.44177			-
Candelina	0.958355			-
Drechslera	0.926785			-
Potebniamyces	1.31093			-
Sporormiella	2.32148			-
Amphinema	2.06085			-
Gloeohypochnicium	0.943305			-
Cladia	1.66457			-
Punctularia	1.70845			-
Nigrospora	3.06354			-
Pestalotiopsis	3.27651			-
Coniochaeta	1.56221			-
Mycoleptodiscus	4.50164			-
Amphobotrys	2.79671			-
Schizophyllum	3.52367			-
Venturia	2.50869			-
Collembolispora	2.05973			-
Cystoderma	3.61793			-
Verpa	0.553091			-
Sarcoleotia	1.68784			-
Heterotextus	2.04383			-
Sphacelotheca	1.75519			-
Gymnopus	0.511337			-
Ascochyta	3.90065			-
Cryptodiaporthe	0.511337			-
Sarcosoma	1.00623			-
Citeromyces	2.61786			-
Tomentella	2.79472			-
Chaetomella	1.19088			-
Flammulina	1.79442			-
Pulvinula	1.01726			-
Rattania	0.716229			-
Pichia	4.55242			-
Ophiosphaerella	1.13898			-
Clathrus	2.43471			-
Naohidea	2.01198			-
Thozetella	1.13898			-
Aureobasidium	2.72954			-
Neurospora	1.25206			-
Stereocaulon	2.08393			-
Puccinia	2.45768			-
Mycocentrospora	2.54616			-
Rotiferophthora	3.13807			-
Kockovaella	2.41712			-
Gigaspora	2.03126			-
Rhizosphaera	1.75076			-
Neonectria	2.5823			-
Gnomoniella	1.65746			-
Lignosus	0.716229			-
Hyaloscypha	3.50542			-
Membranomyces	0.716229			-
Leccinum	1.08661			-
Lambertella	0.888674			-
Asterosporium	2.199			-
Diplochytridium	1.59052			-
Recurvomyces	3.2367			-
Mycoacia	3.52798			-
Hamigera	0.404169			-
Morchella	2.80973			-
Schizosaccharomyces	1.2068			-
Annulohypoxylon	1.62039			-
Pseudocyphellaria	1.40594			-
Cylindrocladiella	1.01726			-
Hydnocystis	0.958355			-
Hygrophorus	1.72929			-
Clydaea	1.70845			-
Ochroconis	1.1134			-
Rhytidhysteron	0.716229			-
Lachnella	1.76281			-
Metarhizium	2.49086			-
Hypholoma	2.54322			-
Guepiniopsis	2.58812			-
Gnomonia	0.511337			-
Lophodermella	2.24811			-
Strumella	1.94708			-
Phellinidium	1.109			-
Ocellularia	0.716229			-
Coprinus	1.94074			-
Clavariadelphus	3.11673			-
Schaereria	0.404169			-
Hydropisphaera	1.93011			-
Basidioascus	2.62542			-
Daedalea	0.716229			-
Acanthophysium	4.21194			-
Omphalotus	2.04938			-
Bulleromyces	0.404169			-
Kochiomyces	1.57439			-
Hydropunctaria	2.24642			-
Physciella	0.532363			-
Sydowiella	2.33192			-
Sebacina	2.40222			-
Nematoctonus	2.00195			-
Pseudocraterellus	0.553091			-
Xanthophyllomyces	0.716229			-
Arthroderma	1.23901			-
Xanthoria	2.22446			-
Protomyces	3.06581			-
Ramicandelaber	2.49485			-
Rhexocercosporidium	0.404169			-
Russula	2.5787			-
Dissoconium	1.30559			-
Meria	1.21031			-
Fistulina	3.14917			-
Trichosporon	4.59491			-
Ascotaiwania	2.27603			-
Bahusakala	1.54109			-
Pycnoporellus	0.958355			-
Diplotomma	1.29546			-
Pyrenochaeta	4.12676			-
Myxotrichum	2.70207			-
Galiella	2.01198			-
Anomoporia	2.06268			-
Mycoblastus	0.631884			-
Carpoligna	1.72717			-
Absconditella	0.970324			-
Microporus	2.85407			-
Tubaria	1.91698			-
Sordaria	0.631884			-
Pholiota	2.9209			-
Phlebiopsis	1.73972			-
Pleuroflammula	1.67849			-
Saccharicola	2.48873			-
Cylindrium	1.25884			-
Boletinellus	2.0269			-
Leifidium	1.26405			-
Orbiliopsis	1.2538			-
Antrodia	3.06276			-
Helicomyces	2.26073			-
Heyderia	1.35852			-
Camarosporium	0.511337			-
Pacispora	2.39874			-
Elaphomyces	1.95892			-
Lacrymaria	0.716229			-
Sporotrichum	0.96302			-
Sidera	1.82623			-
Dacrymyces	2.35852			-
Lophodermium	2.98744			-
Grammothele	2.2804			-
Phaeosphaeriopsis	3.17778			-
Asterostroma	0.812367			-
Gamsiella	0.511337			-
Wardomyces	0.716229			-
Drechslerella	0.511337			-
Capnodium	1.30298			-
Macrophomina	1.07078			-
Caloplaca	2.27295			-
Schizothecium	0.988458			-
Vibrissea	1.85768			-
Dentocorticium	2.81398			-
Bactrodesmium	2.13742			-
Tarzetta	2.6229			-
Cyathicula	2.87296			-
Haplographium	1.97833			-
Boletus	3.00285			-
Irpex	3.28308			-
Helicosporium	2.27468			-
Ceriporiopsis	1.3335			-
Thelidium	1.34563			-
Lichtheimia	1.6782			-
Rigidoporus	1.37746			-
Camposporium	0.511337			-
Junghuhnia	2.65804			-
Armillaria	2.23913			-
Staurothele	2.11049			-
Cryptodiscus	1.47698			-
Craterellus	2.04733			-
Monilinia	3.6201			-
Henningsomyces	1.95161			-
Chrysosporium	1.64664			-
Fusculina	0.970195			-
Resinicium	2.67656			-
Piptoporus	2.52156			-
Calycina	2.04876			-
Cerrena	2.89943			-
Dasyscyphella	2.02314			-
Chaenotheca	1.2754			-
Saccharata	1.91072			-
Lipomyces	3.77556			-
Mycopappus	0.404169			-
Toxicocladosporium	2.40348			-
Polydesmia	2.2407			-
Coniothyrium	3.39693			-
Sarcopodium	1.25938			-
Tranzschelia	0.553091			-
Cercophora	2.78199			-
Chalara	2.00403			-
Phellinus	3.10096			-
Rhodotorula	4.17005			-
Ramichloridium	1.83729			-
Cylindrobasidium	3.13478			-
Exidiopsis	0.532363			-
Ceratobasidium	2.21185			-
Apophysomyces	2.06073			-
Subplenodomus	0.532363			-
Dumontinia	1.94708			-
Pseudophloeospora	1.14681			-
Vascellum	1.55023			-
Catapyrenium	1.44581			-
Babjeviella	2.10448			-
Troposporella	0.631884			-
Porodisculus	2.66573			-
Muscodor	1.84056			-
Clonostachys	1.58771			-
Phaeothecoidea	2.98941			-
Hyphodiscus	1.79942			-
Metus	1.44177			-
Phaeomoniella	2.76459			-
Diehliomyces	1.84796			-
Pannaria	2.0823			-
Rhynchosporium	2.67043			-
Phialea	2.2259			-
Podosphaera	3.93693			-
Xenochalara	1.40735			-
Boeremia	2.14821			-
Phakopsora	1.01726			-
Scheffersomyces	1.5991			-
Scedosporium	1.1134			-
Brachiosphaera	0.631884			-
Phyllactinia	2.60965			-
Glarea	1.75593			-
Gelasinospora	0.511337			-
Mycochaetophora	1.72852			-
Helvella	1.42238			-
Stachybotrys	1.14547			-
Punctelia	0.631884			-
Reddellomyces	0.404169			-
Tubulicrinis	1.36658			-
Valsaria	0.932914			-
Sirobasidium	1.78311			-
Daedaleopsis	3.3037			-
Massaria	0.511337			-
Discinella	1.23901			-
Pseudotaeniolina	0.716229			-
Monoblepharella	0.511337			-
Ambispora	3.93021			-
Lentinellus	2.19044			-
Therrya	1.01726			-
Dicarpella	0.426123			-
Blastocladiella	4.46645			-
Chroogomphus	1.7167			-
Gyromitra	1.87406			-
Amanita	3.73274			-
Arthrobotrys	2.15034			-
Spongipellis	1.16701			-
Helminthosporium	2.14997			-
Nothojafnea	0.988458			-
Phaeolus	1.65789			-
Coccidioides	0.812367			-
Paecilomyces	1.99083			-
Pringsheimia	1.98682			-
Phanerochaete	2.74479			-
Xeromphalina	1.00948			-
Calicium	0.705199			-
Rhizocarpon	1.73723			-
Flavocetraria	2.24006			-
Xenasmatella	0.631884			-
Bifusella	1.13878			-
Malbranchea	1.1419			-
Curvularia	2.26774			-
Eremascus	0.926785			-
Strelitziana	2.44177			-
Furcaspora	2.13334			-
Tetragoniomyces	1.54109			-
Gloeotinia	1.56133			-
Cribbea	2.06268			-
Savoryella	1.73587			-
Laccaria	2.19617			-
Fusidium	1.17784			-
Protubera	0.511337			-
Dactylella	3.12663			-
Tulostoma	1.35643			-
Geniculisynnema	0.705199			-
Absidia	1.65956			-
Pycnopeziza	1.91889			-
Leucoagaricus	1.00287			-
Cyphellophora	2.38456			-
Monodictys	2.78199			-
Blakeslea	2.01198			-
Paraglomus	0.631884			-
Fomitopsis	2.51244			-
Taphrina	4.60178			-
Kuraishia	2.50075			-
Rhodosporidium	3.56453			-
Basidioradulum	2.55389			-
Moristroma	1.94708			-
Ramariopsis	1.98267			-
Hymenogaster	1.96034			-
Psilocybe	2.15335			-
Sphaceloma	2.13671			-
Scleropezicula	3.11042			-
Genea	1.25267			-
Esslingeriana	1.49507			-
Rinodina	1.25938			-
Berkleasmium	1.95052			-
Veronaea	2.60345			-
Gymnostellatospora	0.833813			-
Hirsutella	1.39231			-
Mycena	1.56515			-
Allomyces	1.49507			-
Sporidiobolus	2.89917			-
Cylindrotrichum	1.5093			-
Smittium	2.05998			-
Guignardia	2.44096			-
Cantharellus	2.04172			-
Chlamydotubeufia	0.511337			-
Fonsecaea	0.404169			-
Pseudoplectania	1.25938			-
Saitoella	1.90982			-
Calonectria	2.25429			-
Peniophora	4.99821			-
Bolbitius	2.90541			-
Geoglossum	1.95432			-
Lulworthia	2.44693			-
Batrachochytrium	1.929			-
Pleurotus	2.47092			-
Isaria	2.05408			-
Aliquandostipite	1.17436			-
Phaeoisariopsis	0.631884			-
Pesotum	1.07078			-
Orbilia	1.80008			-
Umbelopsis	1.80959			-
Catillaria	0.631884			-
Phlogicylindrium	1.50406			-
Seimatosporium	1.60401			-
Cochliobolus	1.07078			-
Leucangium	1.94708			-
Schismatomma	2.24642			-
Umbilicaria	3.48454			-
Leucostoma	1.7428			-
Plagiostoma	3.11265			-
Aquaticola	1.64666			-
Melanogaster	0.812367			-
Inonotus	2.53785			-
Pilobolus	2.84348			-
Lachnum	3.98074			-
Streptobotrys	2.31301			-
Liberomyces	1.65138			-
Sporothrix	0.404169			-
Echinodontium	2.4404			-
Calcarisporiella	1.01726			-
Exidia	4.08649			-
Lagarobasidium	2.62297			-
Sparassis	2.17247			-
Gongronella	1.43463			-
Fomitiporia	1.50745			-
Cunninghamella	2.18605			-
Acrophialophora	1.92005			-
Bjerkandera	1.57375			-
Hydnellum	1.84212			-
Ceratocystiopsis	0.958355			-
Artomyces	3.21607			-
Syzygites	1.42518			-
Lecythophora	2.57339			-
Trichomonascus	1.2538			-
Pochonia	2.29878			-
Asterotremella	2.61847			-
Protocrea	1.61142			-
Spizellomyces	1.7428			-
Diaporthe	0.96302			-
Siphula	0.631884			-
Claviceps	1.10493			-
Peniophorella	2.10742			-
Knufia	1.43533			-
Engyodontium	1.17436			-
Capnobotryella	1.56565			-
Periconia	3.00098			-
Rutstroemia	1.49256			-
Sporisorium	0.669002			-
Alatospora	4.61516			-
Waitea	1.85458			-
Filobasidium	2.52328			-
Apodus	2.6504			-
Wettsteinina	2.34493			-
Dactylellina	1.97851			-
Dwayaangam	1.86939			-
Sterigmatomyces	0.404169			-
Cyphellopsis	0.812367			-
Digitodesmium	1.99232			-
Fusicladium	1.31829			-
Phyllotopsis	1.65789			-
Sistotrema	3.49045			-
Dingleya	2.09614			-
Eutypella	3.73482			-
Marasmius	2.24642			-
Pseudohydnum	0.932914			-
Thysanophora	1.51526			-
Thamnostylum	0.631884			-
Hyphodontia	2.81125			-
Campanophyllum	1.98976			-
Physcia	1.65732			-
Gloeophyllum	2.85824			-
Readeriella	1.69357			-
Hymenopellis	1.21031			-
Conocybe	1.73651			-
Zasmidium	1.59453			-
Phyllosticta	0.786012			-
Canalisporium	1.76372			-
Calyptella	1.78763			-
Kazachstania	0.404169			-
Terfezia	2.01198			-
Bionectria	2.48698			-
Steccherinum	2.52297			-
Chaetomium	2.24811			-
Coltricia	2.31927			-
Cerinomyces	1.14922			-
Sarcomyxa	2.13482			-
Xylaria	1.53208			-
Peltigera	1.82785			-
Clathrosporium	0.716229			-
Daldinia	2.86794			-
Auriculoscypha	0.631884			-
Pleospora	1.84079			-
Hortaea	0.511337			-
Creosphaeria	3.54598			-
Pilaira	2.55442			-
Scutellinia	0.926785			-
Phaeosphaeria	3.41768			-
Lentinula	0.955589			-
Scleroderma	2.03997			-
Ceratorhiza	1.97219			-
Crepidotus	2.14697			-
Pseudoidriella	2.31699			-
Lecanactis	1.44014			-
Phaeocryptopus	1.70388			-
Batcheloromyces	0.631884			-
Nadsonia	2.36906			-
Zeloasperisporium	1.35643			-
Phaeocollybia	0.926785			-
Neocosmospora	1.69074			-
Pseudorobillarda	2.59294			-
Clathrosphaerina	2.42934			-
Heterochaete	2.06917			-
Elasticomyces	1.44177			-
Stylonectria	0.426123			-
Hyaloraphidium	3.00377			-
Epicoccum	4.04273			-
Westerdykella	2.21145			-
Phoma	3.78819			-
Hyphopichia	2.41892			-
Clitopilus	1.23133			-
Microdochium	2.73572			-
Brachyphoris	0.631884			-
Kuehneromyces	1.01726			-
Trametopsis	1.74288			-
Saccharomyces	2.56864			-
Handkea	0.716229			-
Celosporium	2.29774			-
Botryobasidium	2.5248			-
Tolypocladium	3.02742			-
Menispora	0.631884			-
Rhytisma	2.52095			-
Pseudocercospora	2.24811			-
Amphiporthe	1.57375			-
Oxyporus	2.81458			-
Ascocoryne	3.35296			-
Chaetosphaeria	2.11446			-
Pycnoporus	2.24811			-
Mycocalicium	3.31682			-
Oidiodendron	2.83609			-
Myrothecium	3.95711			-
Shiraia	0.511337			-
Racocetra	1.65789			-
Hydnobolites	1.88467			-
Sarcoscypha	1.83783			-
Hymenochaete	2.92348			-
Gymnopilus	1.16263			-
Oligoporus	2.35982			-
Porpomyces	2.20266			-
Tryblidiopsis	3.34223			-
Guehomyces	2.89278			-
Xenopolyscytalum	1.91809			-
Eucasphaeria	2.29045			-
Arachnopeziza	1.43545			-
Erythrobasidium	1.39442			-
Cetraria	1.1134			-
Psathyrella	3.23975			-
Kurtzmanomyces	1.8005			-
Mariannaea	1.27135			-
Munkovalsaria	1.63652			-
Placopyrenium	0.631884			-
Incrucipulum	2.99107			-
Nolanea	2.40561			-
Setomelanomma	1.65775			-
Everhartia	0.631884			-
Elsinoe	1.99232			-
Glomerella	1.41771			-
Entoloma	2.60341			-
Dendrophora	4.35566			-
Octaviania	2.47654			-
Volvariella	2.24642			-
Fibulobasidium	2.32268			-
Sphaeropsis	1.44177			-
Cryptosporiopsis	3.14167			-
Cytospora	1.97274			-
Dermea	1.78675			-
Penidiella	1.94708			-
Botryotinia	2.88889			-
Antrodiella	2.63743			-
Hohenbuehelia	2.59937			-
Trichaptum	4.7792			-
Morosphaeria	3.12907			-
Scopulariopsis	0.958355			-
Phaeophleospora	2.21992			-
Utharomyces	1.94312			-
Ramalina	0.76208			-
Trechispora	3.56849			-
Amauroascus	1.22608			-
Pluteus	2.3287			-
Hypochnicium	2.44644			-
Cryptosphaeria	2.12918			-
Monochaetia	2.01159			-
Xenomeris	1.91482			-
Hymenoscyphus	2.89917			-
Pucciniastrum	1.50398			-
Myelochroa	1.99358			-
Thermomyces	2.14074			-
Stilbum	1.8851			-
Zygoascus	2.14612			-
Aphanobasidium	2.56554			-
Femsjonia	2.62803			-
Hyalodendriella	2.64551			-
Xerocomus	2.49507			-
Rachicladosporium	1.89409			-
Synchytrium	0.404169			-
Roussoella	1.25661			-
Cladosporium	4.2838			-
Catenulostroma	1.7428			-
Taeniolella	0.716229			-
Gautieria	1.25646			-
Oudemansiella	3.40603			-
Thecaphora	1.54109			-
Phymatotrichopsis	1.69357			-
Eudarluca	0.705199			-
Cookeina	2.65329			-
Lecanora	1.65937			-
Monascus	1.27695			-
Tephromela	0.511337			-
Chrysomphalina	1.1134			-
Phaeosaccardinula	1.94708			-
Devriesia	3.12842			-
Tuber	5.27865			-
Nawawia	2.72791			-
Phomopsis	2.17372			-
Ctenomyces	1.13911			-
Geastrumia	1.32841			-
Lecanicillium	1.79028			-
Endosporium	1.90712			-
Neoaleurodiscus	1.7961			-
Zygotorulaspora	0.511337			-
Placopsis	0.631884			-
Ascosphaera	1.61545			-
Phylloporus	1.86072			-
Acanthostigma	1.21031			-
Sarcodon	1.9627			-
Arthrographis	0.511337			-
Atla	0.716229			-
